# Supplementary material for: Hemosiderin Accumulation in Liver Decreases Iron Availability in Tachycardia-Induced Porcine Congestive Heart Failure Model
Source: MDPI journal article supplement (doi:10.3390/ijms23031026), 2022-01-18
Supplement: s1 [file s1]

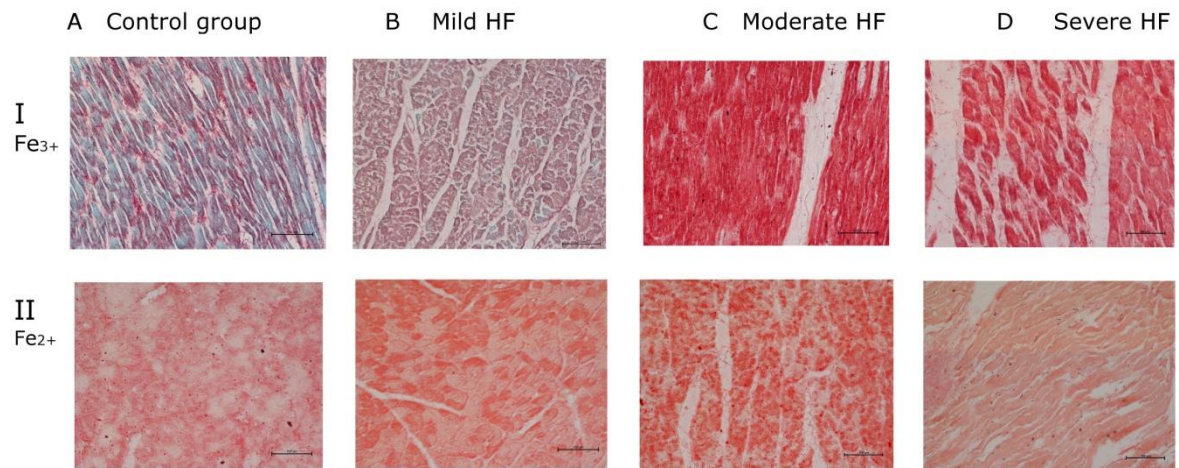

**Supplementary Figure S1.** Histochemical detection of tissue Fe<sup>3+</sup> by Prussian Blue reaction (panel I), and Fe<sup>2+</sup> by Turnbull's Blue reaction (panel II) in representative LV sections from control group (A), pigs with mild HF (B), moderate HF (C), and severe HF (D). 200×original magnification

**Supplementary Table S1:** Biometric parameters, echocardiographic parameters reflecting the morphology and functioning of left ventricle, and neurohormonal activation in sham-operated and HF pigs (mild, moderate, and severe HF groups).

| Variables, units                | controls<br>(n=6) | mild HF<br>(n=9) | moderate<br>HF<br>(n=9) | severe HF<br>(n=8) | Spearman correlatory<br>rank coefficients R<br>with <i>P</i> , for all<br>animals |
|---------------------------------|-------------------|------------------|-------------------------|--------------------|-----------------------------------------------------------------------------------|
| Biometric parameters            |                   |                  |                         |                    |                                                                                   |
| heart wt/body wt<br>(g/kg)      | 3.8 ± 0.6         | 5.1 ± 1.2*       | 7.2 ± 2.3*              | 6.1 ± 2.3*         | R=0.56, <i>P</i> =0.002                                                           |
| liver wt/body wt<br>(g/kg)      | 19.0 ± 4.3        | 29.4 ± 10.1**    | 22.9 ± 3.7              | 41.9 ± 7.9**       | R=0.70, <i>P</i> =0.00004                                                         |
| Echocardiographic<br>parameters |                   |                  |                         |                    |                                                                                   |
| LVEF (%)                        | 53 ± 8            | 43 ± 12          | 29 ± 13**               | 25 ± 8**           | R=-0.70, <i>P</i> =0.000006                                                       |
| LVIDd (cm)                      | 5.92 ± 0.40       | 6.73 ± 0.43**    | 7.57 ± 0.37**           | 7.38± 0.35**       | R=0.74, <i>P</i> =0.000001                                                        |
| LVIDs (cm)                      | 4.50 ± 0.31       | 5.21 ± 0.46**    | 6.46 ± 0.50**           | 6.46 ± 0.43**      | R=0.81, <i>P</i> =0.000001                                                        |
| LVEDV (mL)                      | 176 ± 27          | 237 ± 30**       | 305 ± 32**              | 284±32**           | R=0.73, <i>P</i> =0.000002                                                        |
| LVESV (mL)                      | 93 ± 15           | 132 ± 28**       | 214 ± 34**              | 214±34**           | R=0.80, <i>P</i> =0.000001                                                        |
| LVPW thickening<br>(%)          | 52 ± 8            | 53 ± 10          | 42 ± 26                 | 19±14**            | R=-0.65, <i>P</i> =0.00005                                                        |
| Neurohormonal<br>activation     |                   |                  |                         |                    |                                                                                   |
| BNP (ng/mL)                     | 0.26 ± 0.23       | 0.27 ± 0.16      | 0.59 ± 0.46             | 0.72 ± 0.32*       | R=0.52, <i>P</i> =0.003                                                           |

|                           |             |              |              |               |                  |
|---------------------------|-------------|--------------|--------------|---------------|------------------|
| PRA (ng/mL/h)             | 0.51 ± 0.60 | 1.02 ± 0.86  | 1.56 ± 1.54  | 8.08 ± 6.45** | R=0.62, P=0.0001 |
| ADR (nmol/L) <sup>‡</sup> | 0.74 ± 0.80 | 0.57 ± 0.85  | 2.11 ± 2.41  | 4.18 ± 2.58   | R=0.45, P=0.04   |
| NOR (nmol/L) <sup>‡</sup> | 1.23 ± 0.34 | 0.71 ± 0.37* | 5.06 ± 3.40* | 4.65 ± 3.74   | R=0.41, P=0.06   |
| Aldosterone (pg/ml)       | 548.9±163.2 | 769.3±315.1  | 777.9±277.5  | 1554±1132     | R=0.54, P=0.001  |
| Cortisol (ng/ml)          | 40 ± 13     | 47 ± 15      | 52 ± 17      | 61 ± 32       | R=0.40, P=0.025  |

wt, weight; LVEF, LV ejection fraction; LVIDd, LV internal dimension at end diastole; LVEDV, LV end-diastolic volume; LVESV, LV end-systolic volume; LVPW, LV posterior wall; LVPW thickening = [(LVPWs – LVPWd)/LVPWd] × 100% (LVPWs, LV posterior wall thickness at systole; LVPWd, LV posterior wall thickness at diastole); BNP, B-type natriuretic peptide; PRA, plasma renin activity; ADR, [adrenaline](#); NOR, [noradrenaline](#). <sup>‡</sup> these values were measured in 21 individuals, controls (n=5), mild (n=6), moderate (n=6), and severe (n=4) HF.

All Values are described as means ± standard deviation. Statistical significance was determined by the Mann-Whitney U test (\* P <0.05 vs. control group; \*\* P <0.01 vs. control group).

Relationships between examined parameters and HF severity were analyzed using Spearman's rank correlation.

**Supplementary Table S2:** Relationships between hematological parameters, indices of iron status, and echocardiographic parameters, as well as the measures of neurohormonal activation in all pigs.

|                            | RBC<br>(×10 <sup>12</sup> /L) | R-RBC<br>(%)  | Hb<br>(mmol/L<br>) | R-Hb<br>(%)    | HCT<br>(%)    | R-HCT<br>(%) | WBC<br>(×10 <sup>9</sup> /L) | PLT<br>(×10 <sup>9</sup> /L) | Serum iron<br>(µg/dL) | TSAT<br>(%)      | TIBC<br>(µg/dL) |
|----------------------------|-------------------------------|---------------|--------------------|----------------|---------------|--------------|------------------------------|------------------------------|-----------------------|------------------|-----------------|
| heart wt/body wt<br>(g/kg) | ns                            | ns            | ns                 | ns             | ns            | ns           | ns                           | - 0.41<br>0.03               | ns                    | ns               | ns              |
| liver wt/body wt<br>(g/kg) | 0.58<br>0.001                 | 0.55<br>0.002 | 0.49<br>0.008      | 0.56<br>0.002  | 0.56<br>0.002 | 0.40<br>0.04 | - 0.49<br>0.008              | ns                           | - 0.62<br>0.0005      | -0.58<br>0.02    | ns              |
| LVEF (%)                   | ns                            | ns            | ns                 | ns             | ns            | ns           | 0.51<br>0.002                | 0.54<br>0.002                | 0.58<br>0.0004        | 0.62<br>0.004    | ns              |
| LVIDd (cm)                 | ns                            | 0.36<br>0.04  | ns                 | 0.45<br>0.01   | ns            | 0.38<br>0.03 | ns                           | ns                           | - 0.36<br>0.04        | - 0.49<br>0.03   | ns              |
| LVIDs (cm)                 | ns                            | 0.35<br>0.04  | ns                 | 0.47<br>0.009  | ns            | 0.38<br>0.04 | - 0.49<br>0.004              | - 0.49<br>0.005              | - 0.50<br>0.003       | - 0.70<br>0.0066 | 0.47<br>0.04    |
| LVEDV (mL)                 | ns                            | 0.36<br>0.04  | ns                 | 0.45<br>0.01   | ns            | 0.37<br>0.04 | ns                           | ns                           | ns                    | - 0.48<br>0.04   | ns              |
| LVESV (mL)                 | ns                            | ns            | ns                 | 0.46<br>0.003  | ns            | 0.36<br>0.04 | - 0.50<br>0.004              | - 0.51<br>0.004              | - 0.49<br>0.004       | - 0.68<br>0.001  | 0.49<br>0.03    |
| LVPW<br>thickening (%)     | - 0.46<br>0.007               | ns            | - 0.44<br>0.01     | - 0.44<br>0.02 | ns            | ns           | 0.60<br>0.0007               | 0.49<br>0.005                | 0.51<br>0.003         | 0.76<br>0.0001   | - 0.49<br>0.03  |
| BNP (ng/mL)                | ns                            | ns            | 0.40<br>0.03       | ns             | 0.41<br>0.03  | 0.37<br>0.05 | ns                           | - 0.39<br>0.03               | ns                    | ns               | ns              |
| PRA (ng/mL/h)              | 0.51                          | 0.51          | 0.43               | 0.58           | 0.61          | 0.46         | - 0.42                       | ns                           | - 0.39                | - 0.58           | ns              |

|                     |              |               |      |               |               |              |                |                |                |                |                |
|---------------------|--------------|---------------|------|---------------|---------------|--------------|----------------|----------------|----------------|----------------|----------------|
|                     | 0.003        | 0.003         | 0.02 | 0.0008        | 0.0003        | 0.008        | 0,02           |                | 0.03           | 0.01           |                |
| Aldosterone (pg/ml) | 0.41<br>0.02 | 0.54<br>0.001 | ns   | 0.53<br>0.003 | 0.51<br>0.003 | 0.45<br>0.01 | -0.42<br>0.02  | ns             | ns             | ns             | 0.47<br>0.04   |
| ADR (nmol/L)        | ns           | ns            | ns   | ns            | ns            | ns           | -0.66<br>0.001 | -0.58<br>0.007 | ns             | -0.54<br>0.02  | 0.53<br>0.02   |
| NOR (nmol/L)        | ns           | ns            | ns   | ns            | ns            | ns           | -0.53<br>0.01  | ns             | ns             | ns             | -0.66<br>0.002 |
| Cortisol (ng/ml)    | ns           | ns            | ns   | ns            | ns            | 0.44<br>0,02 | - 0,38<br>0,04 | ns             | - 0.45<br>0.01 | - 0.58<br>0.01 | 0.59<br>0.008  |

wt, weight; LVEF, LV ejection fraction; LVIDd, LV internal dimension at end diastole; LVEDV, LV end-diastolic volume; LVESV, LV end-systolic volume; LVPW, LV posterior wall; LVPW thickening = [(LVPWs – LVPWd)/ LVPWd] × 100% (LVPWs, LV posterior wall thickness at systole; LVPWd, LV posterior wall thickness at diastole); BNP, B-type natriuretic peptide; PRA, plasma renin activity; RBC, Red Blood Cell count, R-RBC, relative change in RBC during the experiment time (RBC in end-point/RBC in t=0)\*100%; Hb, hemoglobin concentration; R-Hb, relative change in Hb during the experiment time (Hb in end-point/Hb in t=0)\*100%; HCT, hematocrit; R-HCT; relative change in HCT during the experiment time (HCT in end-point/HCT in t=0)\*100%; WBC, white blood cell count; PLT, platelet count; TSAT, transferrin saturation; TIBC, total iron binding capacity; **ADR**, **adrenaline**; **NOR**, **noradrenaline**; ns, non-significant.

For all correlatory analyses Spearman's rank correlatory coefficients were used. This table presents R value, and the *P* statistics (in italics) for each significant correlation.

**Supplementary Table S3:** Relationships between hematological parameters, indices of iron status, echocardiographic parameters, the measures of neurohormonal activation, and chosen biochemical parameters, and relative ferritin-bound Fe<sup>3+</sup>, assembled ferritin (FTL and FTH) relative level in liver and LV in all pigs.

|                            | Serum albumin (g/L) | AST/ALT        | Glucose (mmol/L) | Liver relative hepcidin expression | Liver relative ferritin-bound Fe <sup>3+</sup> level | Liver relative FTL level | Liver relative FTH level | LV relative ferritin-bound Fe <sup>3+</sup> level | LV relative FTL level | LV relative FTH level |
|----------------------------|---------------------|----------------|------------------|------------------------------------|------------------------------------------------------|--------------------------|--------------------------|---------------------------------------------------|-----------------------|-----------------------|
| RBC (×10 <sup>12</sup> /L) | ns                  | 0.64<br>0.0002 | 0,37<br>0,04     | - 0.42<br>0.02                     | - 0.39<br>0.03                                       | ns                       | ns                       | ns                                                | ns                    | ns                    |
| R-RBC (%)                  | ns                  | 0.59<br>0.0007 | 0,38<br>0,03     | - 0.62<br>0.0003                   | ns                                                   | - 0.44<br>0.01           | ns                       | ns                                                | ns                    | ns                    |
| Hb (mmol/L)                | ns                  | 0.55<br>0.002  | 0,36<br>0,05     | - 0.44<br>0.02                     | ns                                                   | ns                       | ns                       | ns                                                | ns                    | ns                    |
| R-Hb (%)                   | ns                  | 0.61<br>0.0007 | 0,37<br>0,05     | - 0.67<br>0.0001                   | - 0.38<br>0.04                                       | - 0.44<br>0.02           | - 0.40<br>0.03           | ns                                                | 0.52<br>0.005         | ns                    |

|                           |                        |                        |                        |                         |                         |                          |                       |                          |                       |                      |
|---------------------------|------------------------|------------------------|------------------------|-------------------------|-------------------------|--------------------------|-----------------------|--------------------------|-----------------------|----------------------|
| HCT (%)                   | ns                     | 0.64<br><i>0.0002</i>  | 0,44<br><i>0,01</i>    | - 0.52<br><i>0.003</i>  | - 0.40<br><i>0.03</i>   | - 0.41<br><i>0.02</i>    | ns                    | ns                       | ns                    | ns                   |
| R-HCT (%)                 | ns                     | 0.47<br><i>0.01</i>    | ns                     | - 0.65<br><i>0.0002</i> | ns                      | - 0.38<br><i>0.04</i>    | - 0.43<br><i>0.02</i> | ns                       | 0.48<br><i>0.008</i>  | ns                   |
| WBC (×10 <sup>9</sup> /L) | ns                     | - 0.41<br><i>0.03</i>  | ns                     | ns                      | ns                      | ns                       | ns                    | 0.49<br><i>0.005</i>     | - 0.37<br><i>0.04</i> | -0.41<br><i>0,02</i> |
| PLT (×10 <sup>9</sup> /L) | ns                     | - 0.49<br><i>0.006</i> | - 0,37<br><i>0,04</i>  | ns                      | ns                      | ns                       | ns                    | 0.43<br><i>0.02</i>      | ns                    | ns                   |
| Serum iron (µg/dL)        | 0.38<br><i>0.05</i>    | ns                     | - 0.46<br><i>0.007</i> | ns                      | 0.62<br><i>0.0002</i>   | 0.46<br><i>0.01</i>      | ns                    | ns                       | ns                    | ns                   |
| TSAT (%)                  | ns                     | - 0.53<br><i>0.02</i>  | - 0,49<br><i>0.03</i>  | ns                      | 0.65<br><i>0.002</i>    | ns                       | ns                    | ns                       | ns                    | ns                   |
| TIBC (µg/dL)              | 0.64<br><i>0.007</i>   | 0.73<br><i>0.0006</i>  | ns                     | ns                      | ns                      | ns                       | ns                    | ns                       | ns                    | 0.62<br><i>0.005</i> |
| heart wt/body wt (g/kg)   | - 0.53<br><i>0.007</i> | ns                     | ns                     | ns                      | ns                      | ns                       | ns                    | - 0.69<br><i>0.00007</i> | ns                    | ns                   |
| liver wt/body wt (g/kg)   | 0.58<br><i>0.002</i>   | 0.45<br><i>0.02</i>    | ns                     | - 0.62<br><i>0.0007</i> | -0.58<br><i>0.001</i>   | - 0.62<br><i>0.00006</i> | ns                    | ns                       | 0.36<br><i>0.06</i>   | ns                   |
| LVEF (%)                  | ns                     | -0.47<br><i>0.008</i>  | ns                     | ns                      | 0.46<br><i>0.008</i>    | ns                       | 0.36<br><i>0.04</i>   | 0.57<br><i>0.0008</i>    | ns                    | ns                   |
| LVIDd (cm)                | ns                     | ns                     | ns                     | ns                      | - 0.63<br><i>0.0001</i> | - 0.37<br><i>0.04</i>    | - 0.37<br><i>0.04</i> | - 0.57<br><i>0.0007</i>  | 0.42<br><i>0,02</i>   | 0.54<br><i>0.002</i> |
| LVIDs (cm)                | ns                     | 0.49<br><i>0.006</i>   | ns                     | ns                      | ns                      | - 0.39<br><i>0.03</i>    | - 0.41<br><i>0.02</i> | - 0.63<br><i>0.0001</i>  | 0.44<br><i>0.01</i>   | 0.38<br><i>0.03</i>  |
| LVEDV (mL)                | ns                     | ns                     | ns                     | ns                      | ns                      | - 0.36<br><i>0,05</i>    | 0.35<br><i>0,05</i>   | - 0.57<br><i>0.0007</i>  | 0.41<br><i>0,02</i>   | 0.54<br><i>0.002</i> |
| LVESV (mL)                | ns                     | 0.45<br><i>0.01</i>    | ns                     | ns                      | ns                      | - 0.38<br><i>0.03</i>    | - 0.41<br><i>0.02</i> | - 0.64<br><i>0.00008</i> | 0.44<br><i>0.01</i>   | 0.38<br><i>0.03</i>  |
| LVPW thickening (%)       | ns                     | - 0.56<br><i>0.001</i> | - 0,41<br><i>0,02</i>  | ns                      | 0.46<br><i>0.01</i>     | 0.46<br><i>0.01</i>      | 0.52<br><i>0.002</i>  | 0.46<br><i>0.01</i>      | ns                    | ns                   |
| BNP (ng/mL)               | ns                     | ns                     | 0,39<br><i>0,03</i>    | ns                      | - 0.44<br><i>0.02</i>   | - 0.61<br><i>0.005</i>   | - 0.41<br><i>0.03</i> | - 0.54<br><i>0.002</i>   | ns                    | ns                   |
| PRA (ng/mL/h)             | - 0.38<br><i>0.04</i>  | 0.65<br><i>0.0001</i>  | 0,39<br><i>0,03</i>    | -0.65<br><i>0.0001</i>  | - 0.58<br><i>0.0006</i> | - 0.46<br><i>0.009</i>   | - 0.36<br><i>0.04</i> | ns                       | ns                    | ns                   |
| Aldosterone (pg/ml)       | ns                     | 0.64<br><i>0.0002</i>  | ns                     | -0.62<br><i>0.001</i>   | ns                      | ns                       | ns                    | ns                       | ns                    | ns                   |
| ADR (nmol/L)              | ns                     | 0.66<br><i>0.001</i>   | ns                     | ns                      | ns                      | ns                       | ns                    | ns                       | ns                    | ns                   |
| NOR (nmol/L)              | ns                     | 0.56<br><i>0.009</i>   | ns                     | ns                      | ns                      | ns                       | -0.54<br><i>0.01</i>  | ns                       | ns                    | ns                   |
| Cortisol (ng/ml)          | ns                     | 0.58<br><i>0.001</i>   | ns                     | ns                      | ns                      | ns                       | ns                    | ns                       | ns                    | ns                   |

RBC, Red Blood Cell count; R-RBC, relative change in RBC during the experiment time (RBC in end-point/RBC in t=0)\*100%; Hb, hemoglobin concentration; R-Hb, relative change in Hb during the experiment time (Hb in end-point/Hb in t=0)\*100%; HCT, hematocrit; R-HCT, relative change in HCT during the experiment time (HCT in end-point/HCT in t=0)\*100%; WBC, White Blood Cell count; PLT, platelet count, TSAT, transferrin saturation; TIBC, total iron binding capacity; wt, weight; LVEF, LV ejection fraction; LVIDd, LV internal dimension at end diastole; LVEDV, LV end-diastolic volume; LVESV, LV end-systolic volume; LVPW, LV posterior wall; LVPW thickening = [(LVPWs – LVPWd)/ LVPWd] × 100%, and expressed as a percentage (LVPWs, LV posterior wall thickness at systole; LVPWd, LV posterior wall thickness at diastole); BNP, B-type natriuretic peptide; PRA, plasma renin activity; AST, alanine aminotransferase; ALT, aspartate aminotransferase; ADR, adrenaline; NOR, noradrenaline; ns, non-significant.

For all correlatory analyses Spearman's rank correlatory coefficients were used. This table presents R value, and the P statistics (in italics) for each significant correlation.

**Supplementary Table S4:** Histopathological findings after Turnbull's Blue ( $\text{Fe}^{2+}$ ), Prussian Blue ( $\text{Fe}^{3+}$ ), and H&E staining's in hepatic lobule (liver sections) from sham-operated and HF pigs (mild, moderate, and severe HF groups).

|                                              |                                               | Control                                                                             | Mild HF                                                                             | Moderate HF                                                                           | Severe HF                                                                             |
|----------------------------------------------|-----------------------------------------------|-------------------------------------------------------------------------------------|-------------------------------------------------------------------------------------|---------------------------------------------------------------------------------------|---------------------------------------------------------------------------------------|
| $\text{Fe}^{2+}$<br>(Turnbull's staining)    | Kupffer cells                                 | 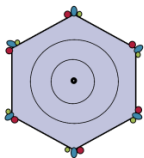   |    |    |    |
|                                              | Kupffer cells – $\text{Fe}^{2+}$ aggregates   |    |    |    |    |
|                                              | hepatocytes - diffuse, cytoplasmatic staining |    |    |    |    |
|                                              | hepatocytes - $\text{Fe}^{2+}$ aggregates     |   |   |   |   |
| $\text{Fe}^{3+}$<br>(Prussian Blue staining) | Kupffer cells                                 |  |  |  |  |
|                                              | Kupffer cells – $\text{Fe}^{3+}$ aggregates   |  |  |  |  |
|                                              | hepatocytes - diffuse cytoplasmatic staining  |  |  |  |  |
|                                              | hepatocytes – $\text{Fe}^{3+}$ aggregates     |  |  |  |  |
| H&E                                          | microvascular steatosis                       |  |  |  |  |

|  |                             |                                                                                   |                                                                                   |                                                                                    |                                                                                     |
|--|-----------------------------|-----------------------------------------------------------------------------------|-----------------------------------------------------------------------------------|------------------------------------------------------------------------------------|-------------------------------------------------------------------------------------|
|  | venous congestion           | 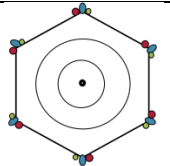 |  |  |  |
|  | degeneration of hepatocytes |  |  |  |  |
|  | hemosiderin                 |  |  |  |  |

Fe staining: -  +  ++  +++ 

H&E staining: -  +  ++  +++ 

no lesion (-), mild lesion (+), moderate lesion (++), and severe lesion (+++).

**Supplementary Table S5:** Immunohistochemical findings (detection of ferritin) in hepatic lobule (liver sections) from sham-operated and HF pigs (mild, moderate, and severe HF groups).

|     |               | CONTROL                                                                             | MILD HF                                                                             | MODERATE HF                                                                          | SEVERE HF                                                                             |
|-----|---------------|-------------------------------------------------------------------------------------|-------------------------------------------------------------------------------------|--------------------------------------------------------------------------------------|---------------------------------------------------------------------------------------|
| FTL | Hepatocytes   | 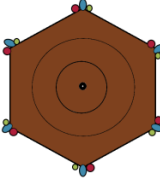   |    |    |    |
|     | Kupffer cells |    |    |    |    |
| FTH | Hepatocytes   |   |   |   |   |
|     | Kupffer cells |  |  |  |  |

IHC staining:  -  +  ++  +++ 

no lesion (-), mild lesion (+), moderate lesion (++) and severe lesion (+++).



**Supplementary Table S6:** Oligonucleotide primers used in RT-PCR experiment

| Gene  | Sequence 5'-3'                               | GenBank accession<br>no. |
|-------|----------------------------------------------|--------------------------|
| GAPDH | TCACTGCCACCCAGAAGA<br>TACCAGGAAATGAGCTTGAC   | AF017079                 |
| HAMP  | CTCCGTTCTCCCATCCCAGA<br>TGGGGAAGTGGGTGTCTCTT | AF516143                 |

GAPDH – glyceraldehyde-3-phosphate dehydrogenase; HAMP – hepcidin;
